# Supplementary material
Source: MDPI journal article supplement (https://www.mdpi.com/2073-4441/14/7/1008)
Supplement: s1 [file s1]

## Supplementary Materials

### 1. New Danish lakes

Tabel S1. Summer means TP-concentration, the lake area, catchment area, and land use of the included new lakes. (a), designates lakes containing brackish water, (b)

| Name                     |  | Established |  | Sampled | Lake area | Catchment | Urban | Agriculture | Forest | Nature | TP summer mean |
|--------------------------|--|-------------|--|---------|-----------|-----------|-------|-------------|--------|--------|----------------|
|                          |  | year        |  | year    | ha        | ha        | %     | %           | %      | %      | mg /l          |
| Alsønderup Engsø         |  | 1987        |  | 2017    | 49        | 9789      | 14    | 37          | 33     | 5      | 0.311          |
| Årslev Engsø             |  | 2006        |  | 2014    | 117       | 26482     | 9     | 70          | 8      | 5      | 0.084          |
| Birkeseø                 |  | 2017        |  | 2018    | 128       | 761       | 0     | 16          | 2      | 81     | 2.497          |
| Bjerre Engsø             |  | 2010        |  | 2015    | 20        | 219       | 0     | 34          | 58     | 4      | 0.044          |
| Bølling Sø               |  | 2004        |  | 2018    | 344       | 2643      | 5     | 55          | 27     | 9      | 0.095          |
| Botofte skovmose         |  | 2009        |  | 2017    | 31        | 521       | 5     | 68          | 20     | 3      | 0.304          |
| Brokholm Sø              |  | 1999        |  | 2016    | 82        | 1809      | 3     | 86          | 2      | 7      | 0.283          |
| Bundsø                   |  | 2015        |  | 2018    | 141       | 1101      | 4     | 87          | 3      | 2      | 0.193          |
| Egå Engsø                |  | 2006        |  | 2019    | 112       | 5435      | 17    | 59          | 6      | 3      | 0.101          |
| Ejsbøl Sø                |  | 2000        |  | 2015    | 17        | 466       | 4     | 83          | 3      | 5      | 0.109          |
| Ellebæksø                |  | 2016        |  | 2018    | 4         | 506       | 4     | 68          | 20     | 3      | 0.060          |
| Filsø                    |  | 2013        |  | 2018    | 889       | 10471     | 4     | 68          | 12     | 13     | 0.083          |
| Føns Vang                |  | 2006        |  | 2012    | 103       | 557       | 4     | 87          | 2      | 2      | 0.218          |
| Fuglsang Sø <sup>b</sup> |  | 2005        |  | 2018    | 29        | 24        | 22    | 12          | 0      | 61     | 0.024          |
| Gødstrup Engsø           |  | 2003        |  | 2014    | 43        | 1082      | 3     | 64          | 21     | 8      | 0.134          |
| Gravlev Sø               |  | 1990        |  | 2017    | 17        | 432       | 5     | 82          | 3      | 7      | 0.088          |
| Gyldensteen Engsø        |  | 2014        |  | 2017    | 139       | 112       | 1     | 62          | 27     | 4      | 0.143          |
| Halkær sø                |  | 2006        |  | 2011    | 89        | 6669      | 7     | 69          | 5      | 13     | 0.278          |
| Hals sø                  |  | 2000        |  | 2013    | 40        | 729       | 9     | 73          | 2      | 4      | 0.098          |
| Hestholm Sø              |  | 2003        |  | 2015    | 213       | 12725     | 6     | 77          | 6      | 6      | 0.101          |

|                             |  |      |  |      |     |       |    |    |    |    |       |
|-----------------------------|--|------|--|------|-----|-------|----|----|----|----|-------|
| Hindemade                   |  | 1994 |  | 2018 | 41  | 6248  | 5  | 71 | 13 | 5  | 0.081 |
| Højby Sø                    |  | 1990 |  | 2015 | 38  | 281   | 11 | 76 | 1  | 3  | 0.292 |
| Holløse Bredning            |  | 1999 |  | 2015 | 50  | 1976  | 21 | 63 | 6  | 3  | 0.380 |
| Hovvig <sup>a</sup>         |  | 1979 |  | 2015 | 45  | 164   | 5  | 14 | 30 | 48 | 3.240 |
| Hundeskov Sø <sup>b</sup>   |  | 2003 |  | 2019 | 11  | 94    | 1  | 17 | 0  | 81 | 0.026 |
| Jordbroå engsø              |  | 2016 |  | 2017 | 105 | 15383 | 3  | 65 | 16 | 10 | 0.322 |
| Juelstrup Sø                |  | 2009 |  | 2016 | 53  | 206   | 7  | 79 | 6  | 5  | 0.234 |
| Kærnsø                      |  | 1999 |  | 2016 | 30  | 70    | 0  | 45 | 0  | 52 | 0.064 |
| Kalø Grå Sø <sup>a</sup>    |  | 1997 |  | 2016 | 8   | 517   | 3  | 84 | 5  | 3  | 1.820 |
| Knabberup Sø                |  | 2009 |  | 2013 | 11  | 21004 | 5  | 64 | 16 | 10 | 0.135 |
| Kongens Kær                 |  | 2009 |  | 2017 | 23  | 90    | 51 | 0  | 29 | 7  | 0.136 |
| Legind Sø                   |  | 1991 |  | 2016 | 18  | 566   | 9  | 60 | 7  | 11 | 0.073 |
| Lillelund Engsø             |  | 2015 |  | 2018 | 5   | 149   | 42 | 21 | 0  | 1  | 0.048 |
| Lønborggård Sø              |  | 1997 |  | 2015 | 53  | 770   | 7  | 78 | 4  | 5  | 0.354 |
| Louns Sø                    |  | 1996 |  | 2017 | 46  | 244   | 7  | 59 | 10 | 24 | 0.542 |
| Maltrup Sø <sup>a</sup>     |  | 2006 |  | 2017 | 13  | 31    | 14 | 66 | 1  | 9  | 1.498 |
| Marbæk Sø - Midt            |  | 1979 |  | 2007 | 4   | 267   | 1  | 41 | 36 | 17 | 0.051 |
| Marbæk Sø - Øst             |  | 1981 |  | 2007 | 2   | 260   | 0  | 51 | 28 | 14 | 0.048 |
| Marbæk Sø - Vest            |  | 1980 |  | 2013 | 13  | 65    | 1  | 5  | 37 | 51 | 0.180 |
| Mjels Sø <sup>a</sup>       |  | 2005 |  | 2018 | 49  | 1491  | 5  | 85 | 3  | 2  | 0.273 |
| Munkesø                     |  | 1930 |  | 2015 | 21  | 1601  | 2  | 72 | 14 | 9  | 0.109 |
| Nakkebølle<br>Inddæmning    |  | 2003 |  | 2015 | 80  | 2016  | 5  | 73 | 13 | 4  | 0.147 |
| Nordredyb                   |  | 2001 |  | 2016 | 26  | 736   | 2  | 73 | 1  | 21 | 0.083 |
| Nordsø Davinde <sup>b</sup> |  | 1995 |  | 2019 | 3   | 18    | 7  | 40 | 5  | 48 | 0.016 |
| Nørreballe Nor              |  | 2006 |  | 2017 | 55  | 697   | 5  | 86 | 3  | 3  | 0.227 |
| Nørrekær                    |  | 1994 |  | 2017 | 29  | 592   | 1  | 8  | 30 | 52 | 0.322 |
| Øde Hastrup <sup>b</sup>    |  | 2018 |  | 2019 | 9   | 15    | 5  | 10 | 0  | 85 | 0.011 |

|                            |  |      |  |      |     |      |    |     |    |    |       |
|----------------------------|--|------|--|------|-----|------|----|-----|----|----|-------|
| Ødis Sø                    |  | 2002 |  | 2012 | 25  | 208  | 12 | 74  | 6  | 1  | 0.296 |
| Oldenor                    |  | 2014 |  | 2014 | 36  | 201  | 1  | 94  | 1  | 2  | 0.542 |
| Ølundgårds<br>inddæmning   |  | 1998 |  | 2017 | 13  | 103  | 2  | 89  | 4  | 2  | 0.313 |
| Østerhestholm Sø           |  | 1997 |  | 2011 | 13  | 18   | 0  | 23  | 0  | 77 | 0.043 |
| Østerø Sø <sup>a</sup>     |  | 1945 |  | 2013 | 27  | 30   | 3  | 5   | 13 | 50 | 0.680 |
| Ravnegård Sø <sup>b</sup>  |  | 2015 |  | 2019 | 3   | 9    | 8  | 22  | 4  | 66 | 0.016 |
| Rejsby Klæggrav            |  | 2007 |  | 2016 | 18  | 197  | 5  | 90  | 0  | 0  | 0.398 |
| Rettrupkær Sø              |  | 2004 |  | 2011 | 28  | 1298 | 3  | 89  | 2  | 2  | 0.164 |
| Ringe Sø                   |  | 2004 |  | 2012 | 14  | 311  | 35 | 41  | 2  | 3  | 0.248 |
| Rødding Sø                 |  | 2004 |  | 2013 | 21  | 319  | 13 | 74  | 2  | 4  | 0.230 |
| Rønnebæk Sø                |  | 2018 |  | 2018 | 8   | 270  | 5  | 76  | 6  | 4  | 0.093 |
| Rugård Søndersø            |  | 1988 |  | 2014 | 8   | 613  | 2  | 58  | 27 | 9  | 1.396 |
| Saltvandssøen <sup>a</sup> |  | 1981 |  | 2011 | 235 | 838  | 0  | 3   | 0  | 69 | 0.322 |
| Sem Sø                     |  | 1997 |  | 2012 | 7   | 352  | 2  | 69  | 23 | 4  | 0.404 |
| Skænken Sø                 |  | 1999 |  | 2008 | 32  | 34   | 0  | 5   | 0  | 95 | 0.066 |
| Skenkel Sø                 |  | 2010 |  | 2015 | 63  | 959  | 22 | 57  | 3  | 5  | 0.584 |
| Slagelse Nysø              |  | 2004 |  | 2016 | 14  | 427  | 4  | 1   | 37 | 4  | 0.056 |
| Slivsø                     |  | 2004 |  | 2014 | 171 | 4786 | 4  | 77  | 11 | 4  | 0.103 |
| Sneum Digesø               |  | 1992 |  | 2014 | 24  | 32   | 0  | 77  | 0  | 18 | 0.280 |
| Solbjerg Engsø             |  | 1993 |  | 2017 | 33  | 4318 | 19 | 23  | 34 | 7  | 0.392 |
| Solkær Enge <sup>a</sup>   |  | 2004 |  | 2012 | 60  | 3654 | 6  | 81  | 5  | 4  | 0.226 |
| Spøttrup Sø                |  | 1994 |  | 2016 | 52  | 1949 | 5  | 82  | 3  | 6  | 0.139 |
| Stenskovsø midt            |  | 2015 |  | 2018 | 0   | 1    | 0  | 100 | 0  | 0  | 0.434 |
| Stenskovsø øst             |  | 2015 |  | 2018 | 2   | 93   | 3  | 93  | 1  | 2  | 0.086 |
| Stenskovsø vest            |  | 2015 |  | 2018 | 2   | 93   | 3  | 93  | 1  | 2  | 0.093 |
| Strødam Engsø              |  | 1996 |  | 2017 | 17  | 2636 | 27 | 20  | 23 | 7  | 0.261 |
| Sundby Sø                  |  | 2008 |  | 2016 | 47  | 2437 | 6  | 84  | 2  | 3  | 0.054 |

|                                    |  |      |  |      |     |        |    |    |    |    |       |
|------------------------------------|--|------|--|------|-----|--------|----|----|----|----|-------|
| Sundet                             |  | 2000 |  | 2013 | 29  | 60     | 0  | 80 | 3  | 12 | 0.196 |
| Syberg Sø                          |  | 2017 |  | 2018 | 29  | 306    | 25 | 51 | 1  | 5  | 0.069 |
| Tange Sø                           |  | 1921 |  | 1980 | 541 | 168323 | 6  | 62 | 17 | 9  | 0.189 |
| Tarm Vestereng                     |  | 2003 |  | 2016 | 71  | 76     | 0  | 12 | 0  | 86 | 0.057 |
| Thissingvig                        |  | 2008 |  | 2017 | 74  | 2882   | 5  | 84 | 4  | 3  | 0.192 |
| Tim Enge                           |  | 2007 |  | 2013 | 84  | 9870   | 3  | 68 | 14 | 12 | 0.055 |
| Tofte Sø                           |  | 1973 |  | 2016 | 74  | 186    | 0  | 0  | 1  | 98 | 1.798 |
| Tønder Nørresø                     |  | 2009 |  | 2015 | 54  | 89926  | 4  | 78 | 7  | 6  | 0.071 |
| Tryggelev Nor<br>Vest <sup>a</sup> |  | 2004 |  | 2009 | 29  | 945    | 5  | 76 | 3  | 14 | 0.580 |
| Tulstrup 1 <sup>b</sup>            |  | 2013 |  | 2019 | 3   | 27     | 4  | 38 | 0  | 55 | 0.018 |
| Tulstrup 3 <sup>b</sup>            |  | 2005 |  | 2019 | 3   | 9      | 0  | 34 | 0  | 66 | 0.017 |
| Udkæret                            |  | 2000 |  | 2016 | 6   | 613    | 2  | 20 | 70 | 2  | 0.487 |
| Valdemar Slotssø                   |  | 2003 |  | 2015 | 16  | 102    | 20 | 46 | 20 | 5  | 0.814 |
| Vilsted Sø                         |  | 2006 |  | 2017 | 450 | 8868   | 4  | 73 | 9  | 9  | 0.149 |
| Vitsø Nor                          |  | 2009 |  | 2015 | 49  | 63     | 0  | 58 | 1  | 37 | 0.198 |
| Wedellsborg<br>Hoved <sup>a</sup>  |  | 2001 |  | 2017 | 10  | 208    | 4  | 54 | 23 | 10 | 0.436 |

2. Regressions between runoff and TP-transport of different soil types (Blicher-Mathiesen et al. 2018):

Tabel S2. TP is in  $\text{kg P ha}^{-1} \text{ year}^{-1}$  and runoff is in mm.

| Loamy soils |                               |                |
|-------------|-------------------------------|----------------|
| %           | regressions                   | R <sup>2</sup> |
| 80          | TP = 0.0011 * runoff - 0.0265 | 0.81           |
| 86          | TP = 0.0017 * runoff - 0.0039 | 0.78           |
| 70          | TP = 0.0014 * runoff - 0.0933 | 0.51           |
| 76          | TP = 0.0012 * runoff + 0.0774 | 0.51           |
| Sandy soils |                               |                |
| 72          | TP = 0.0013 * runoff - 0.0261 | 0.36           |
| 67          | TP = 0.0007 * runoff + 0.0682 | 0.33           |

3. Regression between CA : LA and  $t_w$

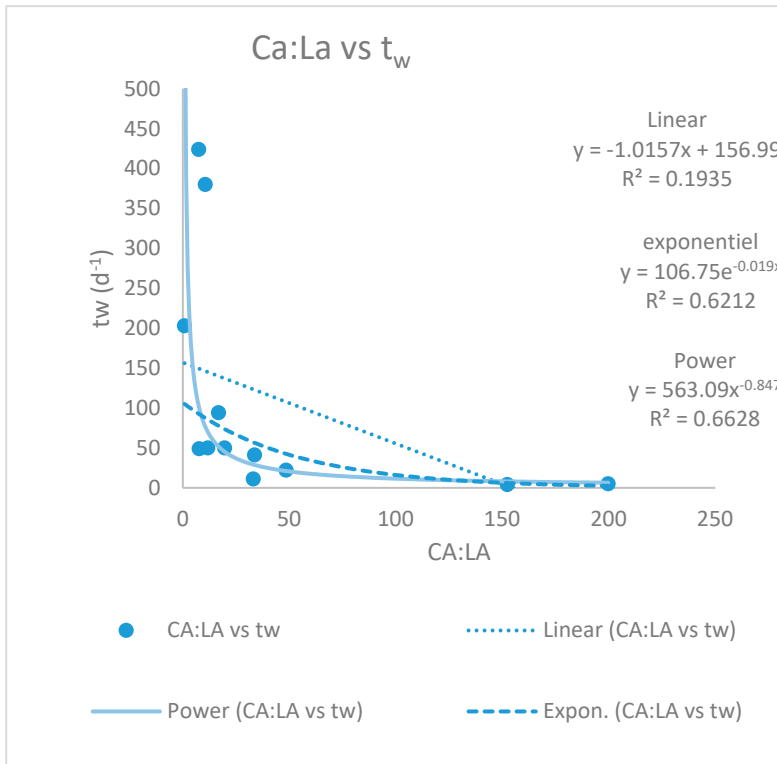

Figure S1. Regression between CA : LA and  $t_w$

4. Regression between  $TP_{\text{Internal}}$ , DIP-flux, and proportion of loamy soil in the catchment.

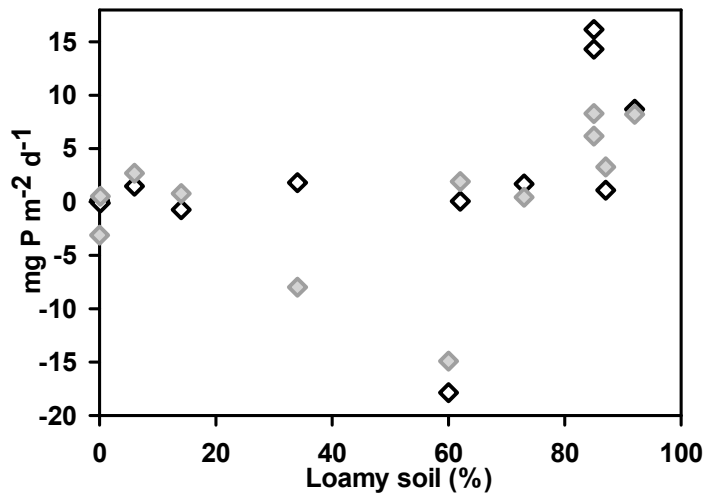

Figure S2.  $TP_{Internal}$  (grey) and DIP-flux (white) as a function of the percentile proportion of loamy soil in the catchment of the 12 selected lakes.

##### 5. Regressions between $TP_{Summer}$ and catchment characteristics

Table S3. Regressions are tested with linear and exponential, and power regressions and the regression with the highest  $R^2$ -value is stated.

| Regressions                    |                   | n  | Type        | equations               | $R^2$ |
|--------------------------------|-------------------|----|-------------|-------------------------|-------|
| $TP_{Summer}$ vs CA:LA         | All lakes         | 90 | linear      | $y = -0.0002x + 0.3676$ | 0.008 |
| $TP_{Summer}$ vs CA:LA         | All lakes (-out)  | 88 | linear      | $y = -0.0011x + 0.4001$ | 0.011 |
| $TP_{Summer}$ vs CA:LA         | Other lakes       | 88 | power       | $y = 0.2263x^{-0.077}$  | 0.015 |
| $TP_{Summer}$ vs CA:LA         | 12 selected lakes | 12 | linear      | $y = 0.0005x + 0.118$   | 0.115 |
| $TP_{Summer}$ vs CA:LA         | Brackish          | 10 | linear      | $y = -0.0061x + 1.127$  | 0.024 |
| $TP_{Summer}$ vs CA:LA         | Gravel-pit lake   | 7  | linear      | $y = 0.0005x + 0.0161$  | 0.084 |
| $TP_{Summer}$ vs Age           | Other lakes       | 61 | linear      | $y = 0.0014x + 0.2653$  | 0.002 |
| $TP_{Summer}$ vs Age           | 12 selected lakes | 12 | linear      | $y = 0.0037x + 0.1035$  | 0.157 |
| $TP_{Summer}$ vs Age           | Brackish          | 10 | linear      | $y = 0.0103x + 0.7644$  | 0.042 |
| $TP_{Summer}$ vs Age           | Gravel-pit lake   | 7  | linear      | $y = 0.0003x + 0.015$   | 0.203 |
| $TP_{Summer}$ vs agriculture % | All lakes         | 90 | linear      | $y = -0.0031x + 0.5282$ | 0.028 |
| $TP_{Summer}$ vs agriculture % | 12 selected lakes | 12 | linear      | $y = 0.002x - 0.0045$   | 0.233 |
| $TP_{Summer}$ vs impermeable % | All lakes         | 90 | Exponential | $y = 0.1594e^{0.0117x}$ | 0.007 |
| $TP_{Summer}$ vs impermeable % | Other lakes       | 61 | Exponential | $y = 0.1658e^{0.0107x}$ | 0.011 |
| $TP_{Summer}$ vs impermeable % | 12 selected lakes | 12 | Exponential | $y = 0.154e^{-0.024x}$  | 0.257 |
| $TP_{Summer}$ vs nature %      | All lakes         | 90 | Linear      | $y = 0.0032x + 0.2846$  | 0.027 |

|                                  |                              |    |             |                         |       |
|----------------------------------|------------------------------|----|-------------|-------------------------|-------|
| TP <sub>Summer</sub> vs nature % | All lakes (-out, - brackish) | 77 | Exponential | $y = 0.183e^{-0.022x}$  | 0.307 |
| TP <sub>Summer</sub> vs nature % | 12 selected lakes            | 12 | Linear      | $y = -0.0048x + 0.1652$ | 0.037 |
| TP <sub>Summer</sub> vs forest % | All lakes (- selected lakes) | 78 | Exponential | $y = 0.1564e^{0.009x}$  | 0.010 |
| TP <sub>Summer</sub> vs forest % | 12 selected lakes            | 12 | power       | $y = 0.0822x^{0.2021}$  | 0.398 |

#### 6. Regressions between measured and modeled TP<sub>Annual</sub> and catchment parameters

Table S4. Regressions are tested with linear and exponential, and power regressions and the regression with the highest R<sup>2</sup>-value is stated.

|                                                          |                   | type        | equation                | R <sup>2</sup> -values |
|----------------------------------------------------------|-------------------|-------------|-------------------------|------------------------|
| TP <sub>ModAnnual</sub> vs Age                           | measured          | Power       | $y = 0.073x^{0.133}$    | 0.060                  |
|                                                          | Natural average   | Linear      | $y = 0.0012x + 0.1008$  | 0.023                  |
|                                                          | Runoff dependent  | Linear      | $y = 0.0015x + 0.0991$  | 0.028                  |
|                                                          | Crop distribution | Linear      | $y = -0.0072x + 0.5641$ | 0.018                  |
|                                                          | Model 1)          | Linear      | $y = 0.0057x + 0.1512$  | 0.184                  |
|                                                          | Model 2)          | Linear      | $y = 0.0019x + 0.0801$  | 0.097                  |
|                                                          | DNC               | Power       | $y = 0.1175x^{-0.114}$  | 0.078                  |
| TP <sub>ModAnnual</sub> vs TP <sub>Annual</sub> measured | measured          | Linear      | $Y = x$                 | 1                      |
|                                                          | Natural average   | Linear      | $y = 0.5764x + 0.0403$  | 0.597                  |
|                                                          | Runoff dependent  | Linear      | $y = 0.7744x + 0.0198$  | 0.785                  |
|                                                          | Crop distribution | Linear      | $y = 4.1707x + 0.0094$  | 0.634                  |
|                                                          | Model 1)          | Linear      | $y = 0.5761x + 0.1342$  | 0.204                  |
|                                                          | Model 2)          | Linear      | $y = 0.2647x + 0.063$   | 0.213                  |
|                                                          | DNC               | Linear      | $y = 0.1259x + 0.089$   | 0.108                  |
| TP <sub>ModAnnual</sub> vs T <sub>W</sub>                | measured          | Exponential | $y = 0.0808e^{0.001x}$  | 0.046                  |
|                                                          | Natural average   | Exponential | $y = 0.0701e^{0.0016x}$ | 0.071                  |
|                                                          | Runoff dependent  | Exponential | $y = 0.0673e^{0.0019x}$ | 0.088                  |
|                                                          | Crop distribution | Exponential | $y = 0.212e^{0.0028x}$  | 0.107                  |
|                                                          | Model 1)          | Exponential | $y = 0.1416e^{0.0005x}$ | 0.005                  |
|                                                          | Model 2)          | Exponential | $y = 0.0704e^{0.0007x}$ | 0.012                  |
|                                                          | DNC               | Linear      | $y = -2E-05x + 0.108$   | 0.006                  |
| TP <sub>ModAnnual</sub> vs loamy soil %                  | measured          | Exponential | $y = 0.0559e^{0.0104x}$ | 0.307                  |
|                                                          | Natural average   | Exponential | $y = 0.0372e^{0.0164x}$ | 0.442                  |
|                                                          | Runoff dependent  | Exponential | $y = 0.0351e^{0.0172x}$ | 0.474                  |
|                                                          | Crop distribution | Exponential | $y = 0.0951e^{0.0222x}$ | 0.437                  |
|                                                          | Model 1)          | Exponential | $y = 0.1036e^{0.0073x}$ | 0.072                  |
|                                                          | Model 2)          | Linear      | $y = 0.0009x + 0.0528$  | 0.339                  |
|                                                          | DNC               | Linear      | $y = 0.0004x + 0.0837$  | 0.186                  |

|                                          |                   |             |                         |       |
|------------------------------------------|-------------------|-------------|-------------------------|-------|
| TP <sub>ModAnnual</sub> vs sandy soil %  | measured          | Exponential | $y = 0.1491e^{-0.01x}$  | 0.225 |
|                                          | Natural average   | Exponential | $y = 0.1927e^{-0.019x}$ | 0.427 |
|                                          | Runoff dependent  | Exponential | $y = 0.1999e^{-0.02x}$  | 0.468 |
|                                          | Crop distribution | Exponential | $y = 0.8765e^{-0.025x}$ | 0.412 |
|                                          | Model 1)          | Exponential | $y = 0.2147e^{-0.008x}$ | 0.066 |
|                                          | Model 2)          | Exponential | $y = 0.1525e^{-0.016x}$ | 0.316 |
|                                          | DNC               | Exponential | $y = 0.133e^{-0.007x}$  | 0.198 |
| TP <sub>ModAnnual</sub> vs agriculture % | measured          | Exponential | $y = 0.0719e^{0.0043x}$ | 0.019 |
|                                          | Natural average   | Exponential | $y = 0.0453e^{0.0116x}$ | 0.070 |
|                                          | Runoff dependent  | Exponential | $y = 0.04e^{0.0137x}$   | 0.094 |
|                                          | Crop distribution | Exponential | $y = 0.0399e^{0.0372x}$ | 0.384 |
|                                          | Model 1)          | Exponential | $y = 0.0442e^{0.0229x}$ | 0.219 |
|                                          | Model 2)          | Exponential | $y = 0.0367e^{0.0137x}$ | 0.101 |
|                                          | DNC               | Exponential | $y = 0.0734e^{0.0052x}$ | 0.044 |
| TP <sub>ModAnnual</sub> vs impermeable % | measured          | Exponential | $y = 0.1122e^{-0.012x}$ | 0.089 |
|                                          | Natural average   | Linear      | $y = 0.0003x + 0.1071$  | 0.004 |
|                                          | Runoff dependent  | Exponential | $y = 0.0862e^{-0.002x}$ | 0.002 |
|                                          | Crop distribution | Exponential | $y = 0.4523e^{-0.024x}$ | 0.106 |
|                                          | Model 1)          | Linear      | $y = -0.0022x + 0.2473$ | 0.088 |
|                                          | Model 2)          | Linear      | $y = 3E-05x + 0.0982$   | 0.000 |
|                                          | DNC               | Exponential | $y = 0.0917e^{0.0029x}$ | 0.009 |
| TP <sub>ModAnnual</sub> vs forest %      | measured          | Exponential | $y = 0.0596e^{0.026x}$  | 0.230 |
|                                          | Natural average   | Exponential | $y = 0.1135e^{-0.019x}$ | 0.068 |
|                                          | Runoff dependent  | Exponential | $y = 0.1031e^{-0.014x}$ | 0.035 |
|                                          | Crop distribution | Exponential | $y = 0.4487e^{-0.028x}$ | 0.080 |
|                                          | Model 1)          | Exponential | $y = 0.2009e^{-0.019x}$ | 0.054 |
|                                          | Model 2)          | Exponential | $y = 0.1156e^{-0.027x}$ | 0.140 |
|                                          | DNC               | Exponential | $y = 0.1259e^{-0.017x}$ | 0.164 |
| TP <sub>ModAnnual</sub> vs nature %      | measured          | Exponential | $y = 0.1251e^{-0.041x}$ | 0.069 |
|                                          | Natural average   | Exponential | $y = 0.1644e^{-0.088x}$ | 0.176 |
|                                          | Runoff dependent  | Exponential | $y = 0.1826e^{-0.103x}$ | 0.237 |
|                                          | Crop distribution | Linear      | $y = -0.0342x + 0.7565$ | 0.086 |
|                                          | Model 1)          | Linear      | $y = 0.0044x + 0.1719$  | 0.024 |
|                                          | Model 2)          | Exponential | $y = 0.1114e^{-0.05x}$  | 0.060 |
|                                          | DNC               | Exponential | $y = 0.1264e^{-0.035x}$ | 0.088 |
| TP <sub>ModAnnual</sub> vs slope         | measured          | Exponential | $y = 0.0784e^{0.025x}$  | 0.050 |
|                                          | Natural average   | Linear      | $y = -0.0007x + 0.1166$ | 0.003 |



|                                             |                   |             |                         |       |
|---------------------------------------------|-------------------|-------------|-------------------------|-------|
|                                             | Runoff dependent  | Linear      | $y = -0.0009x + 0.119$  | 0.004 |
|                                             | Crop distribution | Linear      | $y = -0.0075x + 0.5365$ | 0.008 |
|                                             | Model 1)          | Linear      | $y = -0.0084x + 0.253$  | 0.155 |
|                                             | Model 2)          | Linear      | $y = -0.0015x + 0.1074$ | 0.024 |
|                                             | DNC               | Exponential | $y = 0.0945e^{0.0043x}$ | 0.003 |
| $TP_{ModAnnual}$ vs<br>Annual precipitation | measured          | Exponential | $y = 1.6819e^{-0.003x}$ | 0.341 |
|                                             | Natural average   | Linear      | $y = -0.0005x + 0.4996$ | 0.475 |
|                                             | Runoff dependent  | Exponential | $y = 4.752e^{-0.005x}$  | 0.347 |
|                                             | Crop distribution | Exponential | $y = 41.957e^{-0.006x}$ | 0.290 |
|                                             | Model 1)          | Linear      | $y = -0.0001x + 0.311$  | 0.013 |
|                                             | Model 2)          | Linear      | $y = -0.0003x + 0.3457$ | 0.322 |
|                                             | DNC               | Linear      | $y = -0.0001x + 0.2273$ | 0.183 |
| $TP_{ModAnnual}$ vs lake<br>area            | measured          | Linear      | $y = -1E-04x + 0.1353$  | 0.071 |
|                                             | Natural average   | Linear      | $y = -0.0001x + 0.1389$ | 0.242 |
|                                             | Runoff dependent  | Exponential | $y = 0.1103e^{-0.002x}$ | 0.192 |
|                                             | Crop distribution | Linear      | $y = -0.0005x + 0.5954$ | 0.078 |
|                                             | Model 1)          | Linear      | $y = 0.0001x + 0.1802$  | 0.085 |
|                                             | Model 2)          | Linear      | $y = -0.0001x + 0.1175$ | 0.205 |
|                                             | DNC               | Linear      | $y = -3E-05x + 0.1121$  | 0.053 |
